# Supplementary material for: A controllable Y-shaped DNA structure assisted aptasensor for the simultaneous detection of AFB1 and OTA based on ARGET ATRP
Source: Royal Society of Chemistry journal article supplement (doi:10.1039/d4tb00383g), 2024-01-01
Supplement: d4tb00383g1.pdf [file d4tb00383g1.pdf]

## Supporting Information

### A controllable Y-shaped DNA structure assisted aptasensor for simultaneous detection of AFB<sub>1</sub> and OTA based on ARGET ATRP

Mingsan Miao, <sup>a,b\*</sup> Liang Guo,<sup>a</sup> Jinyan Xue,<sup>a</sup> Yuzhen Jia,<sup>a</sup> Zhenzhen Cui,<sup>a</sup> Huaixia Yang, <sup>\*a</sup>

<sup>a</sup> Pharmacy College, Henan University of Chinese Medicine, Zhengzhou 450046, People's Republic of China

<sup>b</sup> Collaborative Innovation Center of Research and Development on the Whole Industry Chain of Yu-Yao, Henan Province

\*Correspondence authors

Huaixia Yang (yanghuaixia886@163.com)

Mingsan Miao (miaomingsan@163.com)

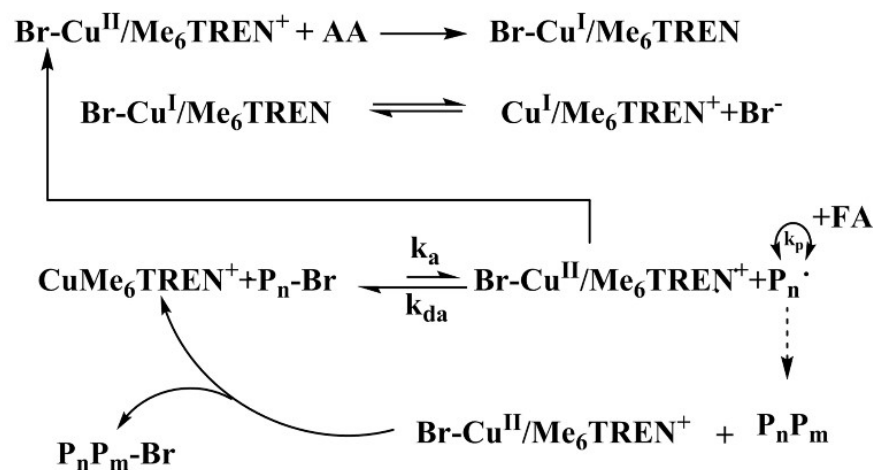

Fig. S1 ARGET ATRP reaction mechanism diagram.

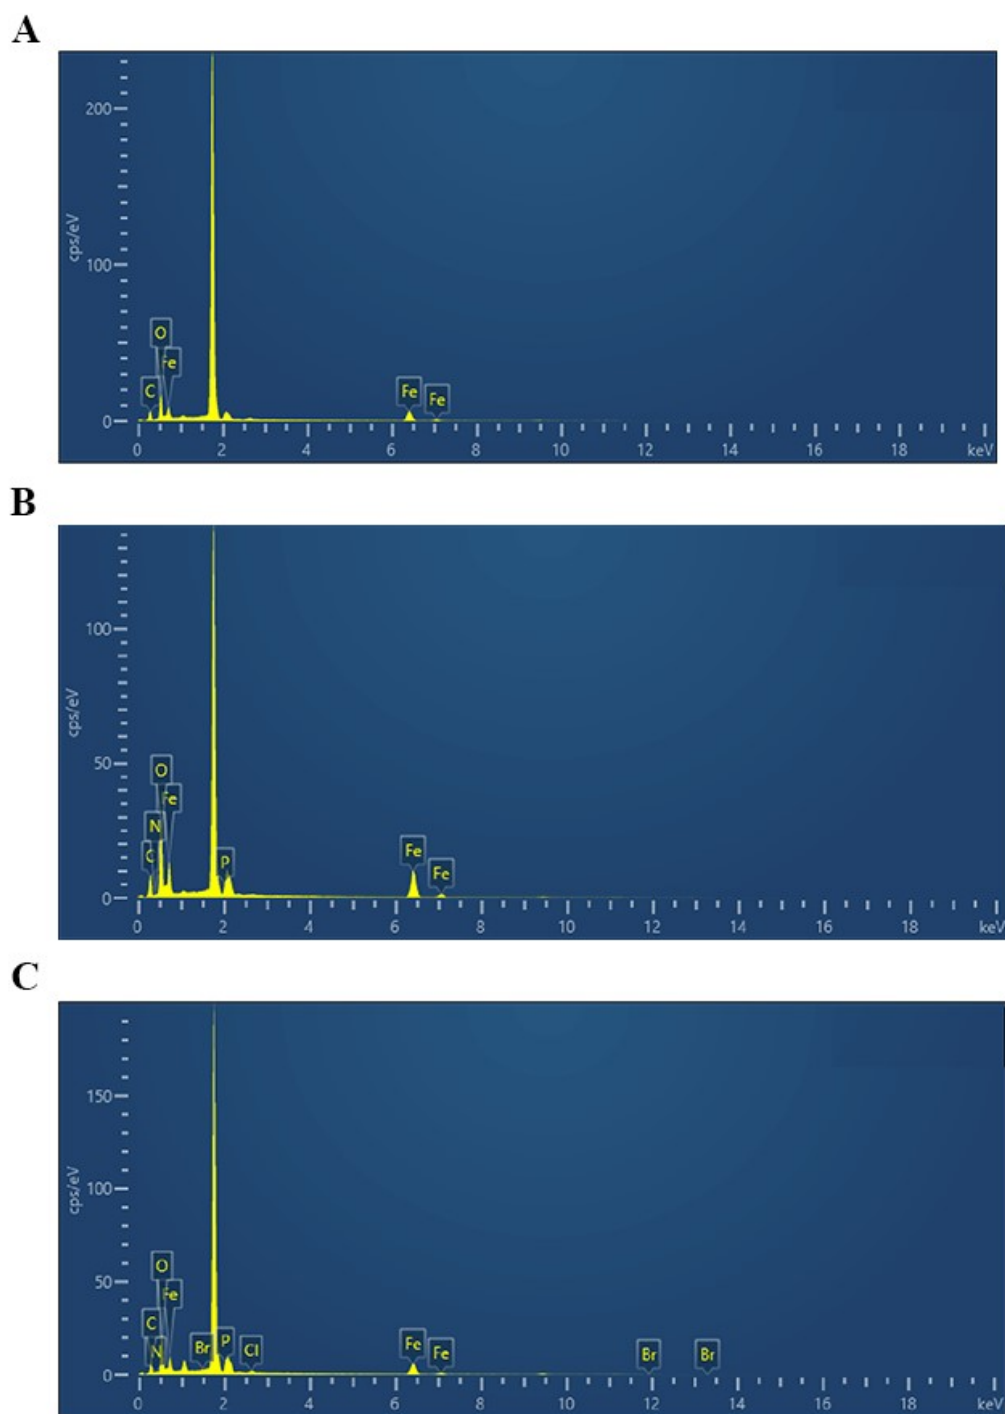

**Fig. S2** EDS spectra of unmodified MBs (A), MBs modified with Y-shaped DNA (B), and MBs modified with Y-shaped DNA, targets and antibody conjugates (C).

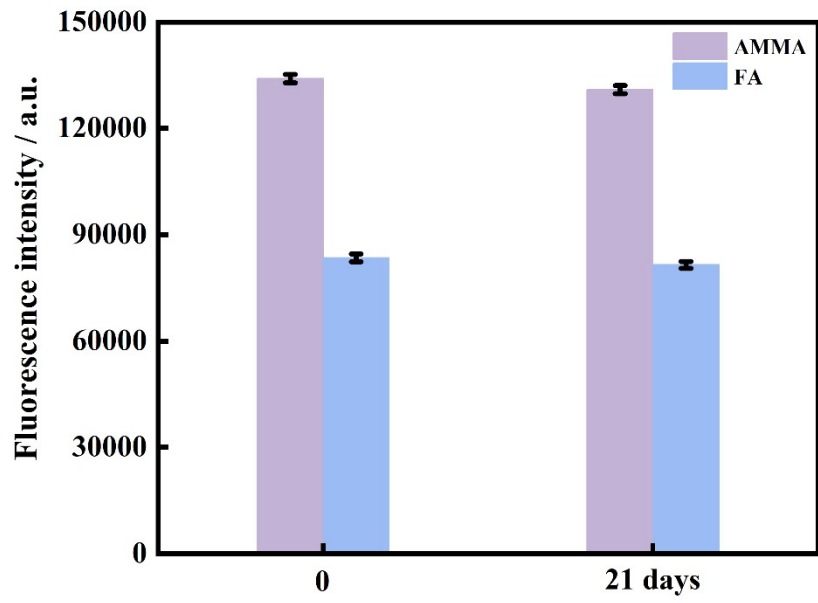

Fig. S3 Stability results of sensor.

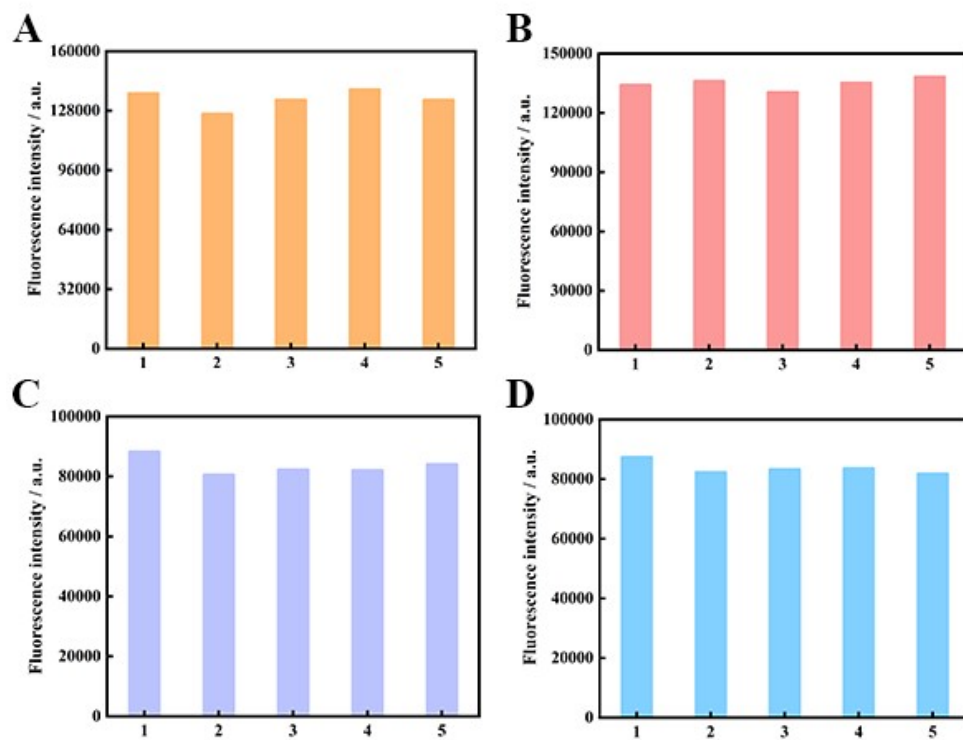

**Fig. S4** Reproducibility results of sensor. The fluorescence intensity of this sensor in AFB<sub>1</sub> (A) and OTA (C) groups. The fluorescence intensity of this sensor between groups of AFB<sub>1</sub> (B) and OTA (D).

**Table S1** Comparison of the linear range and LOD of the sensor system with other methods for detecting OTA and AFB<sub>1</sub>.

| Methods         | Linear range (ng/mL) |                  | LOD (pg/mL) |                  | Ref.             |
|-----------------|----------------------|------------------|-------------|------------------|------------------|
|                 | OTA                  | AFB <sub>1</sub> | OTA         | AFB <sub>1</sub> |                  |
| Fluorescence    | 0.01-100             | 0.005-10         | 5           | 10               | 1                |
| Colorimetry     | 0.5-80               | 5-250            | -           | -                | 2                |
| Electrochemical | 0.03-10              | 0.01-3.0         | 13.3        | 4.3              | 3                |
| Fluorescent     | 0.001-0.05           | 0.001-0.05       | 0.2         | 0.3              | 4                |
| Fluorescence    | 0.002-5              | 0.005-10         | 0.67        | 1.70             | 5                |
| IAC             | 0.26-6.18            | 0.006-0.119      | 126         | 4                | 6                |
| Fluorescence    | 0.002-2000           | 0.002-2000       | 0.0016      | 0.01862          | <b>This Work</b> |

1 W. Ren, J. Pang, R.Ma, X. Liang, M. Wei, Z. Suo, B. He and Y. Liu, *Anal. Chim. Acta*, 2022, 1198, 339556.

2 W. Zhu, L. Li, Z. Zhou, X. Yang, N. Hao, Y. Gu and K. Wang, *Food Chem.*, 2020, 319, 126544.

3 C. Zhu, D. Liu, Y. Li, S. Ma, M. Wang and T. You, *Biosens. Bioelectron.*, 2020, 174, 112654.

4 J. Zhang , Y. Xia, M. Chen, D. Wu, S. Cai, M. Liu, W. He and J. Chen, *Sens. Actuators, B*, 2016, 235, 79-85.

5 J. Qian, C. Ren, C. Wang, W. Chen, X. Lu, H. Li, Q. Liu, H. Nan, H. Li and K. Wang, *Anal. Chim. Acta*, 2018, 1019, 119-127.

6 D. Lu, X. Wang, R. Su, Y. Cheng, H. Wang, L. Luo and Z. Xiao, *Foods*, 2022, 11, 335.
